# Supplementary material for: Cooperation of RAD51 and RAD54 in regression of a model replication fork
Source: PubMed Central journal article supplement — Nucleic Acids Res. 2010 Nov 20;39(6):2153–64. doi: 10.1093/nar/gkq1139 (PMC3064783; doi:10.1093/nar/gkq1139), 2010-11-20

## **Cooperation of RAD51 and RAD54 in regression of a model replication fork**

Dmitry V. Bugreev<sup>1</sup>, Matthew J. Rossi<sup>1</sup>, and Alexander V. Mazin<sup>1,2</sup>

<sup>1</sup>*Department of Biochemistry and Molecular Biology, Drexel University College of Medicine, Philadelphia, PA 19102-1192, United States.* <sup>2</sup>*Institute Cytology and Genetics, Novosibirsk 630090, Russia.*

**This Supplementary Material contains:**

- A. Supplementary Figure 1-2**
- B. Supplementary Table 1-3.**

# A. Supplementary Figure 1

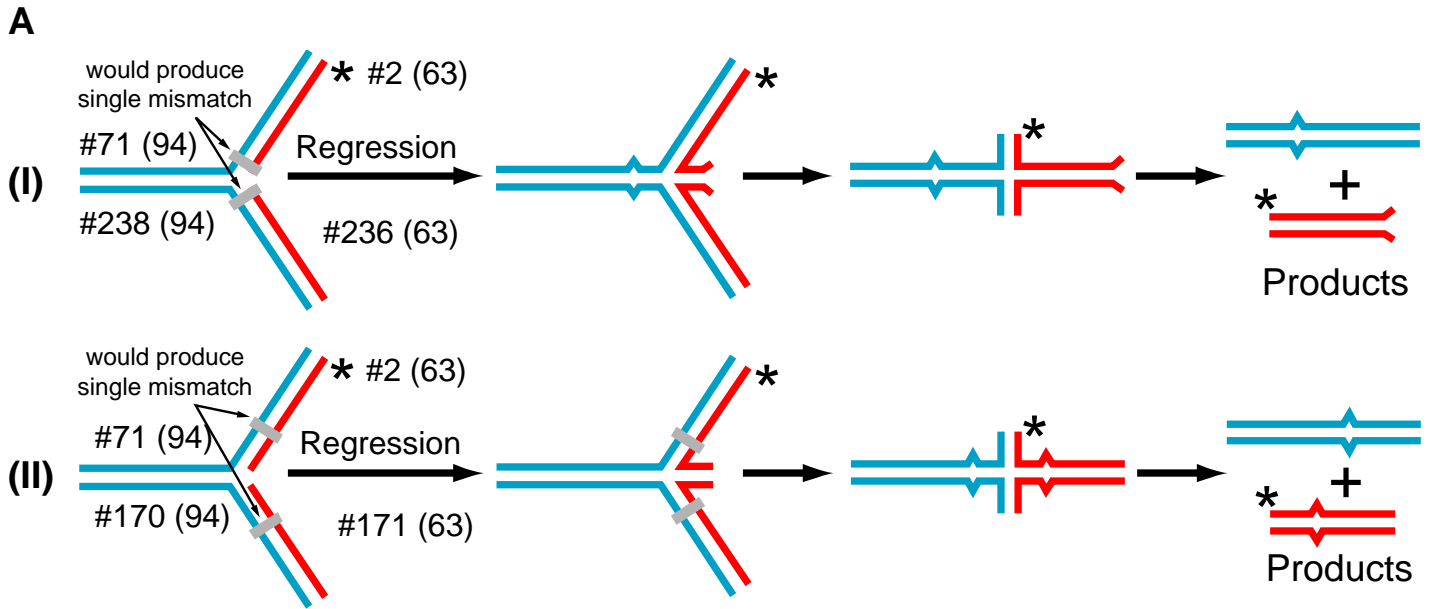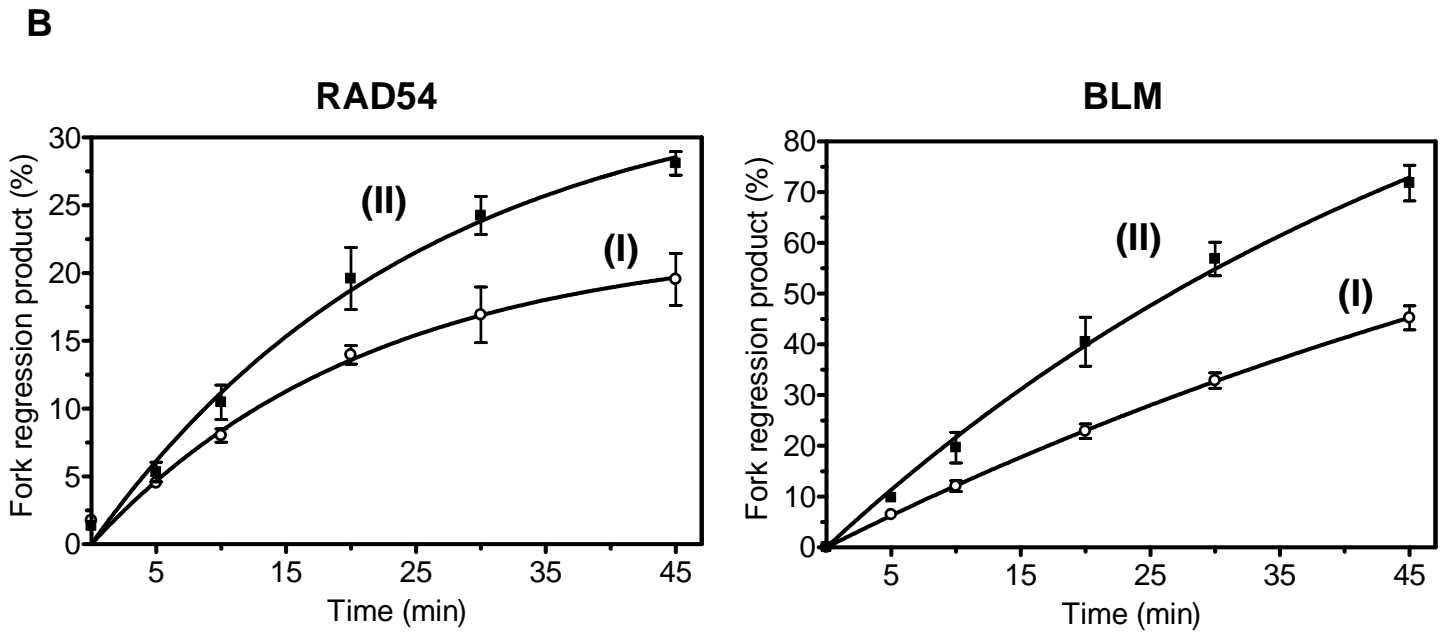

**Supplementary Figure 1. The effect of the heterology position on fork regression.**

(A) The experimental scheme. The asterisk indicates the  $^{32}\text{P}$  label. Positions of heterologous bases that would produce mismatches are shown by grey boxes. Replication forks substrates were prepared by annealing tailed DNA intermediates #71/2\* (32 nM, molecules) with either #238/236 (48 nM, molecules) to produce the fork I, or with #170/171 (48 nM, molecules) to produce the fork II. Annealing was carried out in buffer containing 25 mM Tris acetate, pH 7.5, 2 mM ATP, 5 mM magnesium acetate, 2 mM DTT, BSA (100  $\mu\text{g}/\text{ml}$ ), 15 mM phosphocreatine and creatine phosphokinase (30 units/ml) for 15 min at 37 °C. Fork regression was initiated by addition of RAD54 (100 nM) or BLM (10 nM) and was carried out at 37 °C. At indicated time points aliquots were withdrawn, the reaction was stopped by addition of 1.5% SDS and proteinase K (800  $\mu\text{g}/\text{ml}$ ), mixed with a 0.10 volume of loading buffer (70% glycerol, 0.1% bromophenol blue) and analyzed by electrophoresis in 8% polyacrylamide gels in TBE buffer (89 mM Tris-borate, pH 8.3, and 1 mM EDTA) at 135 V for 1.5 hr. Gels were dried on DEAE-81 paper (Whatman) and the products were quantified using a Storm 840 PhosphorImager (GE Healthcare). (C) The kinetics of fork regression by RAD54 and BLM using fork (I) and fork (II) as substrates. The error bars indicate s.e.m.

## Supplementary Figure 2

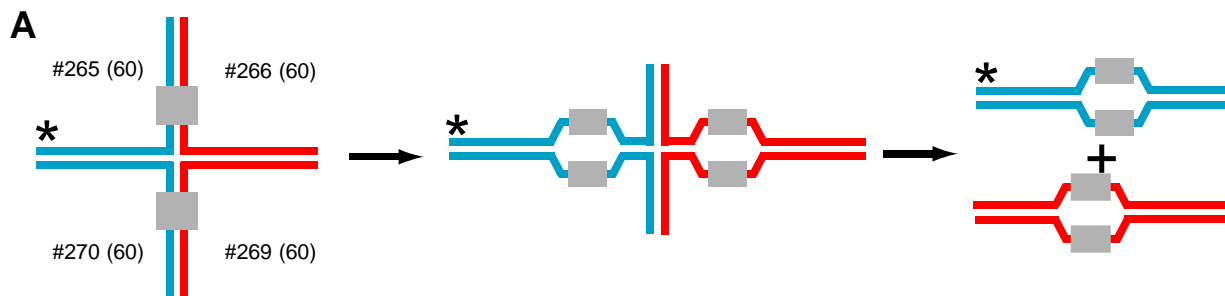

**B** 4-strand

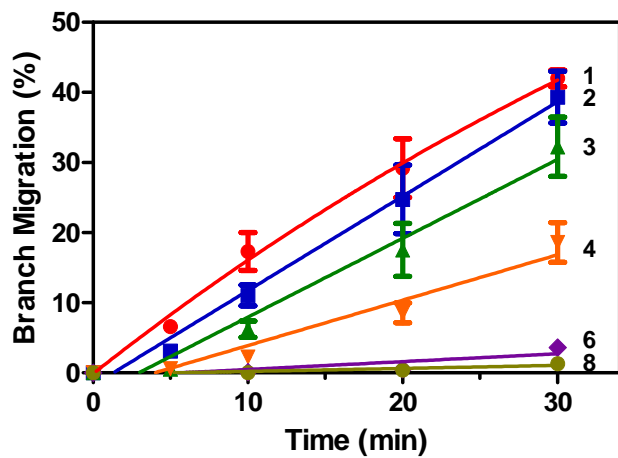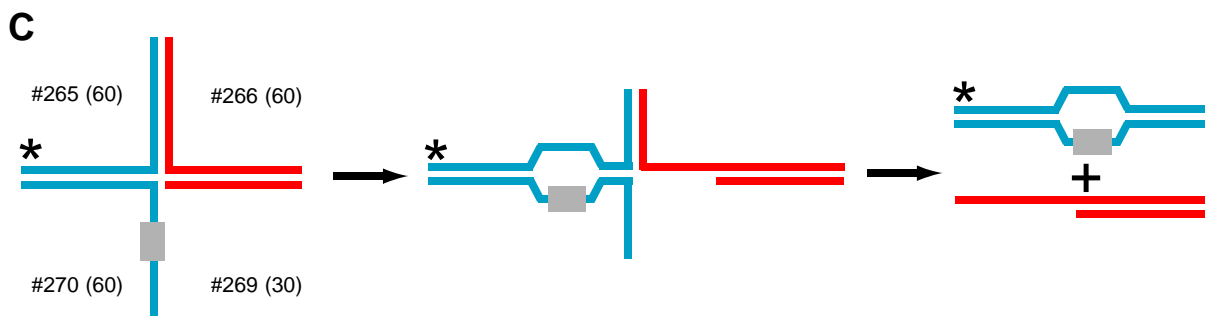

**D** 3-strand

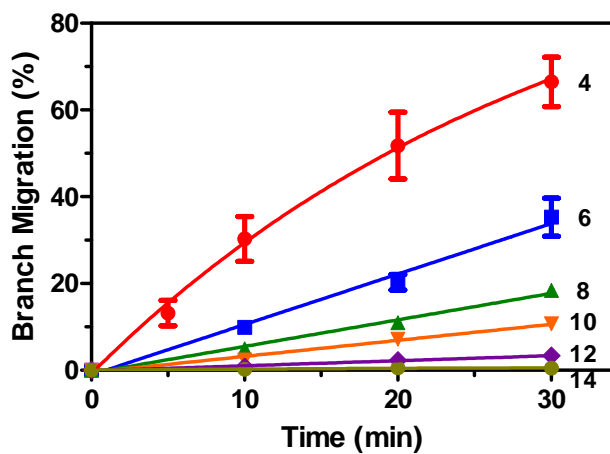

## **Supplementary Figure 2. Effect of the length of mismatches on branch migration**

**by RAD54.** The experimental scheme of 3-strand (A) and 4-strand (C) branch migration. The asterisk indicates the  $^{32}\text{P}$  label. Positions of heterologous bases that would produce mismatches are shown by grey boxes. Partial X-junction (PX) and X-junction substrates were prepared by annealing tailed DNA intermediates (Supplementary Tables. 2 and 3). Annealing was carried out in buffer containing 25 mM Tris acetate, pH 7.5, 2 mM ATP, 10 mM magnesium acetate, 2 mM DTT, BSA (100  $\mu\text{g}/\text{ml}$ ), 15 mM phosphocreatine and creatine phosphokinase (30 units/ml) for 15 min at 30 °C. Branch migration was initiated by addition of RAD54 (100 nM) and was carried out at 30 °C. At indicated time points aliquots were withdrawn, the reaction was stopped by addition of 1.5% SDS and proteinase K (800  $\mu\text{g}/\text{ml}$ ), mixed with a 0.10 volume of loading buffer (70% glycerol, 0.1% bromophenol blue) and analyzed by electrophoresis in 8% polyacrylamide gels in TBE buffer (89 mM Tris-borate, pH 8.3, and 1 mM EDTA) at 135 V for 1.5 hr. Gels were dried on DEAE-81 paper (Whatman) and the products were quantified using a Storm 840 PhosphorImager (GE Healthcare). The kinetics of branch migration by RAD54 using PX-junctions (B) and X-junctions (D) as substrates. The error bars indicate s.e.m.

**C. Supplementary Table 1.** Sequences of the oligonucleotides used in the fork regression portion of this study\*

| Number | Length, nt | Sequence, 5'→3'                                                                                                                     |
|--------|------------|-------------------------------------------------------------------------------------------------------------------------------------|
| #1     | 63         | ACA GCA CCA GAT TCA GCA ATT AAG CTC TAA GCC ATC CGC<br>AAA AAT GAC CTC TTA TCA AAA GGA                                              |
| #2     | 63         | TCC TTT TGA TAA GAG GTC ATT TTT GCG GAT GGC TTA GAG<br>CTT AAT TGC TGA ATC TGG TGC TGT                                              |
| #71    | 94         | CTT TAG CTG CAT ATT TAC AAC ATG TTG ACC TAC AGC ACC<br>AGA TTC AGC AAT TAA GCT CTA AGC CAT CCG CAA AAA TGA<br>CCT CTT ATC AAA AGG A |
| #117   | 94         | T CCT TTT GAT AAG AGG TCA TTT TTG CGG ATG GCT TAG<br>AGC TTA ATT GCT GAA TCT GGT GCT GTA GGT CAA CAT GTT<br>GTA AAT ATG CAG CTA AAG |
| #170   | 94         | T CCT TTT GAT AAG AGG TCA TTT TTG CGG ATG GCT TAG<br>AGC TTA ATT GCT AAA TCT GGT GCT GTA GGT CAA CAT GTT<br>GTA AAT ATG CAG CTA AAG |
| #171   | 63         | ACA GCA CCA GAT TTA GCA ATT AAG CTC TAA GCC ATC CGC<br>AAA AAT GAC CTC TTA TCA AAA GGA                                              |
| #236   | 63         | GCA GCA CCA GAT TCA GCA ATT AAG CTC TAA GCC ATC CGC<br>AAA AAT GAC CTC TTA TCA AAA GGA                                              |
| #238   | 94         | T CCT TTT GAT AAG AGG TCA TTT TTG CGG ATG GCT TAG<br>AGC TTA ATT GCT GAA TCT GGT GCT GCA GGT CAA CAT GTT<br>GTA AAT ATG CAG CTA AAG |
| #290   | 81         | CTT TAG CTG CAT ATT TAC AAC ATG TTG ACC TTC AGT<br>A/ <i>isodC</i> /A ATC TGC TCT GAT GCC GCA TAG TGT CAT GCC<br>AGA GCT TTG TAC    |
| #340   | 81         | CGG GTG TCG GGG CGC ATG ACA CTA TGC GGC ATC AGA GCA<br>GAT TGT ACT GAA GGT CAA CAT GTT GTA AAT ATG CAG CTA<br>AAG                   |
| #341   | 50         | TC AGT ACA ATC TGC TCT GAT GCC GCA TAG TAT CAT GCG<br>CCC CGA CAC CCG                                                               |

| Number | Length, nt | Sequence, 5'→3'                                                                                                                                   |
|--------|------------|---------------------------------------------------------------------------------------------------------------------------------------------------|
| #342   | 43         | GTA CAA AGC TCT GGC ATG <b>ATA</b> CTA TGC GGC ATC AGA GCA<br>GAT T                                                                               |
| #376   | 53         | TCC TTT TGA TAA GAG GTC ATT TTT GCG GAT GGC TTA GAG<br>CTT AAT TGC TGA AT                                                                         |
| #377   | 94         | CTT TAG CTG CAT ATT TAC AAC ATG TTG ACC TAC AGC ACC<br><b>AAA</b> TTC AGC AAT TAA GCT CTA AGC CAT CCG CAA AAA TGA<br>CCT CTT ATC AAA AGG A        |
| #378   | 94         | CTT TAG CTG CAT ATT TAC AAC ATG TTG ACC TAC AGC ACC<br><b>GAA</b> TTC AGC AAT TAA GCT CTA AGC CAT CCG CAA AAA TGA<br>CCT CTT ATC AAA AGG A        |
| #379   | 94         | CTT TAG CTG CAT ATT TAC AAC ATG TTG ACC TAC AGC <b>AAA</b><br><b>GAA</b> TTC AGC AAT TAA GCT CTA AGC CAT CCG CAA AAA TGA<br>CCT CTT ATC AAA AGG A |
| #386   | 94         | CTT TAG CTG CAT ATT TAC AAC ATG TTG ACC TAC <b>CCG GAA</b><br><b>GAA</b> TTC AGC AAT TAA GCT CTA AGC CAT CCG CAA AAA TGA<br>CCT CTT ATC AAA AGG A |
| #417   | 30         | GTA CAA AGC TCT GGC ATG <b>ATA</b> CTA TGC GGC                                                                                                    |

\***Bold Red letters** indicate the nucleotides that form mismatched pairs in the branch migration products.

**Supplementary Table 2.** Sequences of the oligonucleotides used in the branch

migration portion of this study \*

| Number | Length, nt | Sequence, 5'→3'                                                                    |
|--------|------------|------------------------------------------------------------------------------------|
| #265   | 60         | CCT GCA TAC AGA TGT TGA CCC AGC ACT GAC TAC TGT CGT<br>CAA TCA TCG TGC ATC ACA GTG |
| #266   | 60         | CAC TGT GAT GCA CGA TGA TTG ACG ACA GTA GTC AGT GCT<br>GCA GTG GTC AGG TGT CAT CAC |
| #269   | 20         | GTG ATG ACA CCT GAC CAC TG                                                         |
| #270   | 60         | CAC TGT GAT GCA CGA TGA TCA GTG ACA GTA GTC AGT GCT<br>GGG TCA ACA TCT GTA TGC AGG |
| #273   | 60         | CAC TGT GAT GCA CGA TGA TCA GTT CCA GTA GTC AGT GCT<br>GGG TCA ACA TCT GTA TGC AGG |
| #274   | 60         | CAC TGT GAT GCA CGA TGA TCA GTT CAC GTA GTC AGT GCT<br>GGG TCA ACA TCT GTA TGC AGG |
| #275   | 60         | CAC TGT GAT GCA CGA TGA TCA GTT CAC AGA GTC AGT GCT<br>GGG TCA ACA TCT GTA TGC AGG |
| #276   | 60         | CAC TGT GAT GCA CGA TGA TCA GTT CAC AGC TTC AGT GCT<br>GGG TCA ACA TCT GTA TGC AGG |
| #277   | 60         | CAC TGT GAT GCA CGA TGA TCA GTT CAC AGC TGG AGT GCT<br>GGG TCA ACA TCT GTA TGC AGG |
| #337   | 60         | CAC TGT GAT GCA CGA TGA TCG ACG ACA GTA GTC AGT GCT<br>GGG TCA ACA TCT GTA TGC AGG |
| #338   | 60         | GTG ATG ACA CCT GAC CAC TGC AGC ACT GAC TAC TGT CGT<br>CGA TCA TCG TGC ATC ACA GTG |
| #345   | 60         | CAC TGT GAT GCA CGA TGA TCA ACG ACA GTA GTC AGT GCT<br>GGG TCA ACA TCT GTA TGC AGG |
| #346   | 60         | GTG ATG ACA CCT GAC CAC TGC AGC ACT GAC TAC TGT CGT<br>TGA TCA TCG TGC ATC ACA GTG |



| Number | Length, nt | Sequence, 5'→3'                                                                                         |
|--------|------------|---------------------------------------------------------------------------------------------------------|
| #347   | 60         | CAC TGT GAT GCA CGA TGA <b>TCA</b> <b>GCG</b> ACA GTA GTC AGT GCT<br>GGG TCA ACA TCT GTA TGC AGG        |
| #348   | 60         | GTG ATG ACA CCT GAC CAC TGC AGC ACT GAC TAC TGT <b>CGC</b><br><b>TGA</b> TCA TCG TGC ATC ACA GTG        |
| #349   | 60         | GTG ATG ACA CCT GAC CAC TGC AGC ACT GAC TAC TGT <b>CAC</b><br><b>TGA</b> TCA TCG TGC ATC ACA GTG        |
| #350   | 60         | GTG ATG ACA CCT GAC CAC TGC AGC ACT GAC TAC <b>TGG</b> <b>AAC</b><br><b>TGA</b> TCA TCG TGC ATC ACA GTG |
| #351   | 60         | GTG ATG ACA CCT GAC CAC TGC AGC ACT GAC TAC <b>GTG</b> <b>AAC</b><br><b>TGA</b> TCA TCG TGC ATC ACA GTG |

\***Bold red letters** indicate the nucleotides that form mismatched pairs in the branch migration products.

**Supplementary Table 3.** Scheme of replication forks substrates containing heterologous bases used in this study.

**Replication Forks**

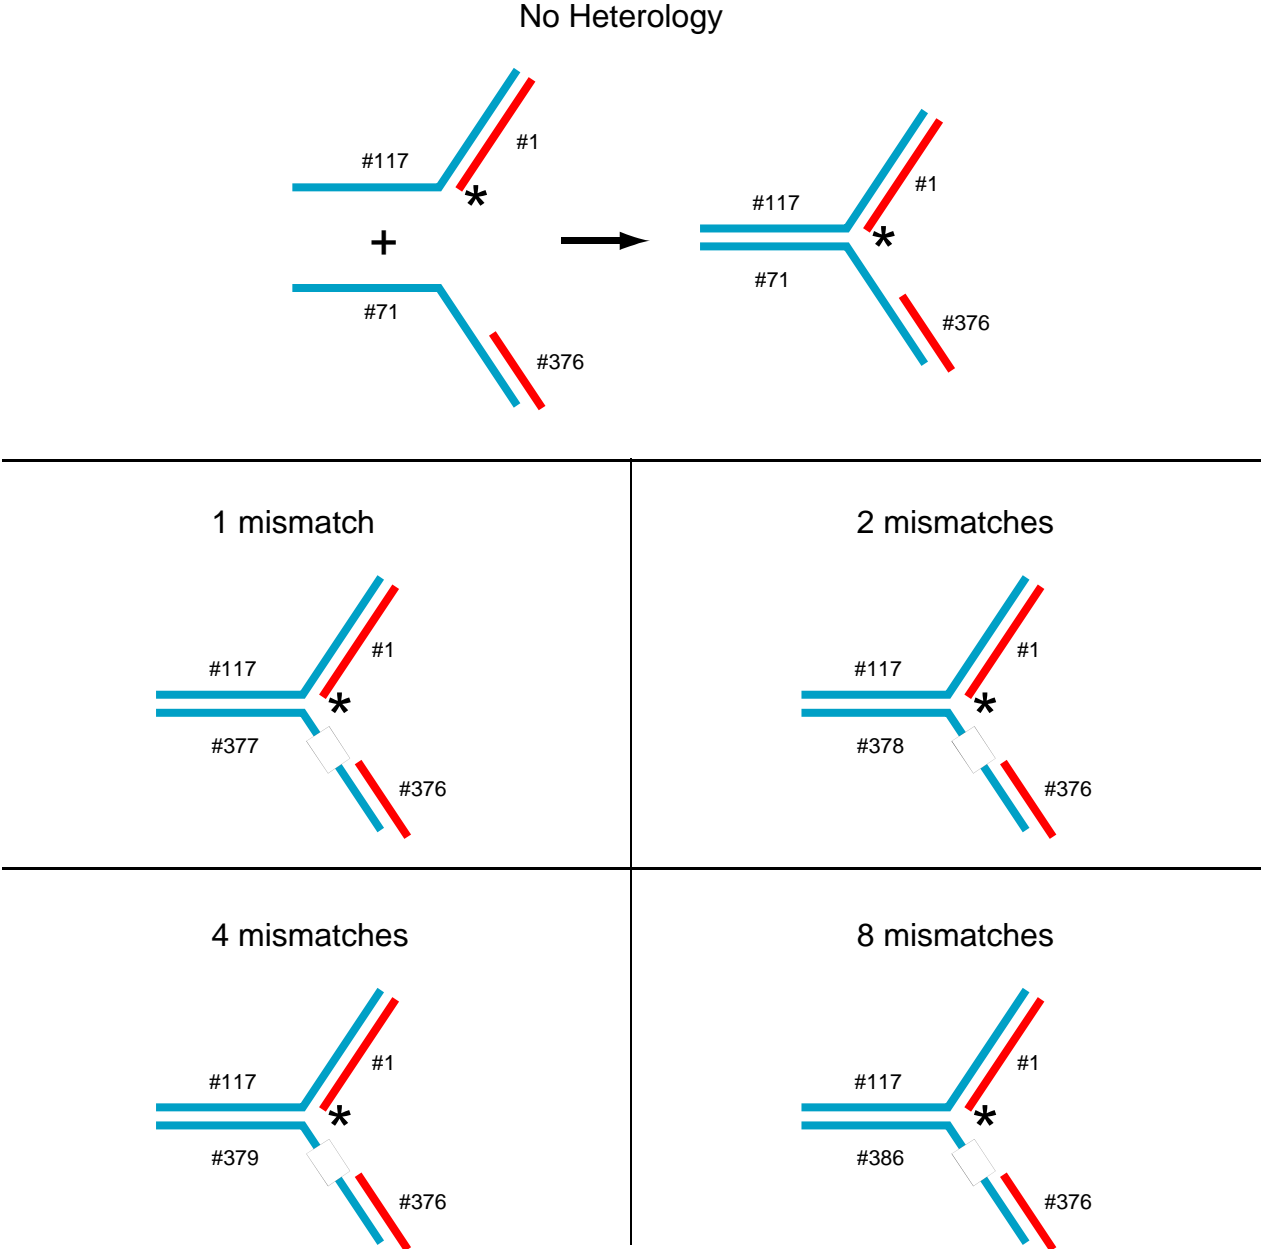

**Supplementary Table 4.** Scheme of partial X-junction and X-junction substrates containing heterologous bases used in this study.

**Parital X-junctions**

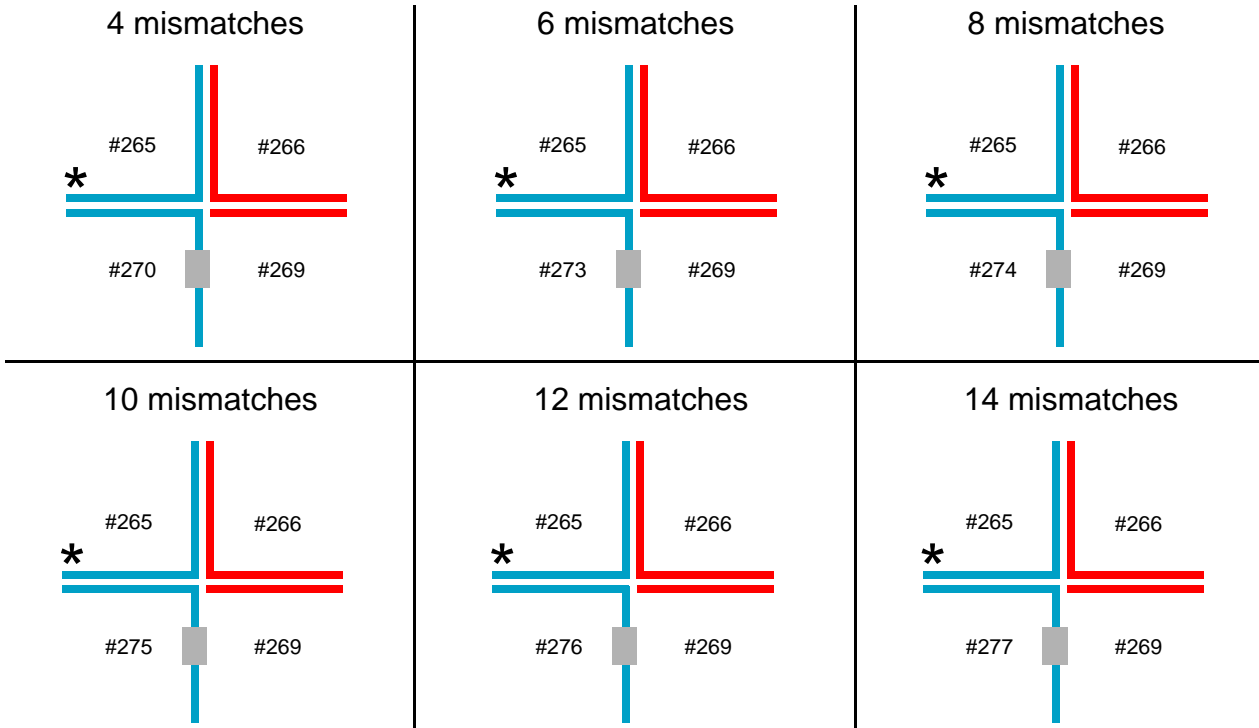

**X-junctions**

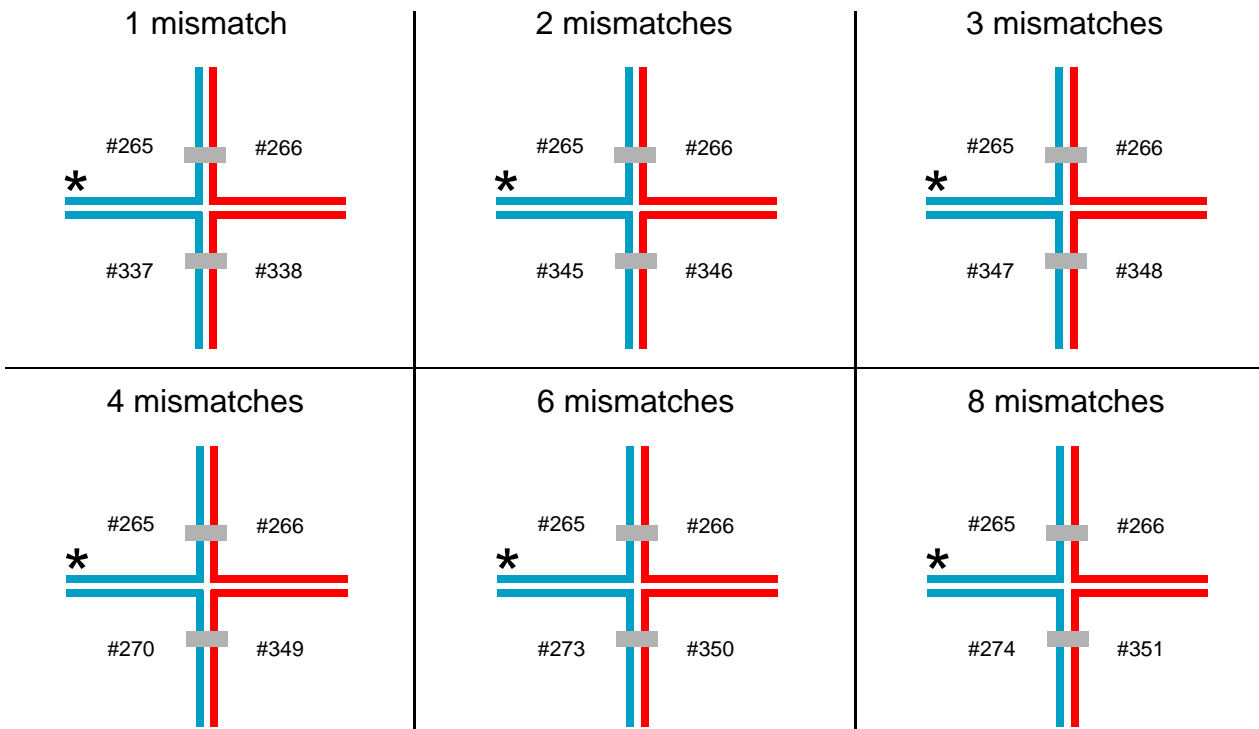

Supplement: supp_gkq1139_Bugreev_Supplement.pdf [file supp_gkq1139_Bugreev_Supplement.pdf]
